# Supplementary material for: Upcycling acrylonitrile-butadiene-styrene Vitrimer ‘in melt’ using a dynamic crosslinker
Source: Research Square preprint supplement (doi:10.21203/rs.3.rs-3618604/v1), 2023-12-15
Supplement: Supplementary file 1 [file c0d9e19f4143dc8fbf2f8e66.docx]

**Supporting Information**

**Upcycling acrylonitrile-butadiene-styrene Vitrimer ‘in melt’ using a dynamic crosslinker**

Siddhesh Sadashiv Rege#, Indranil Dey#, Ria Sen Gupta, Muhammed Ajnas N, Riya Jose, Ashok Misra, Kunal Manna*, Ketaki Samanta*, Suryasarathi Bose*

*Department of Materials Engineering, Indian Institute of Science, Bangalore*

*Corresponding Author email:* [*kunalchemi17@gmail.com*](mailto:kunalchemi17@gmail.com)*;* [*ketakisamanta123@gmail.com*](mailto:ketakisamanta123@gmail.com)*;* [*sbose@iisc.ac.in*](mailto:sbose@iisc.ac.in)

**Synthesis of Castor oil derivatives:**


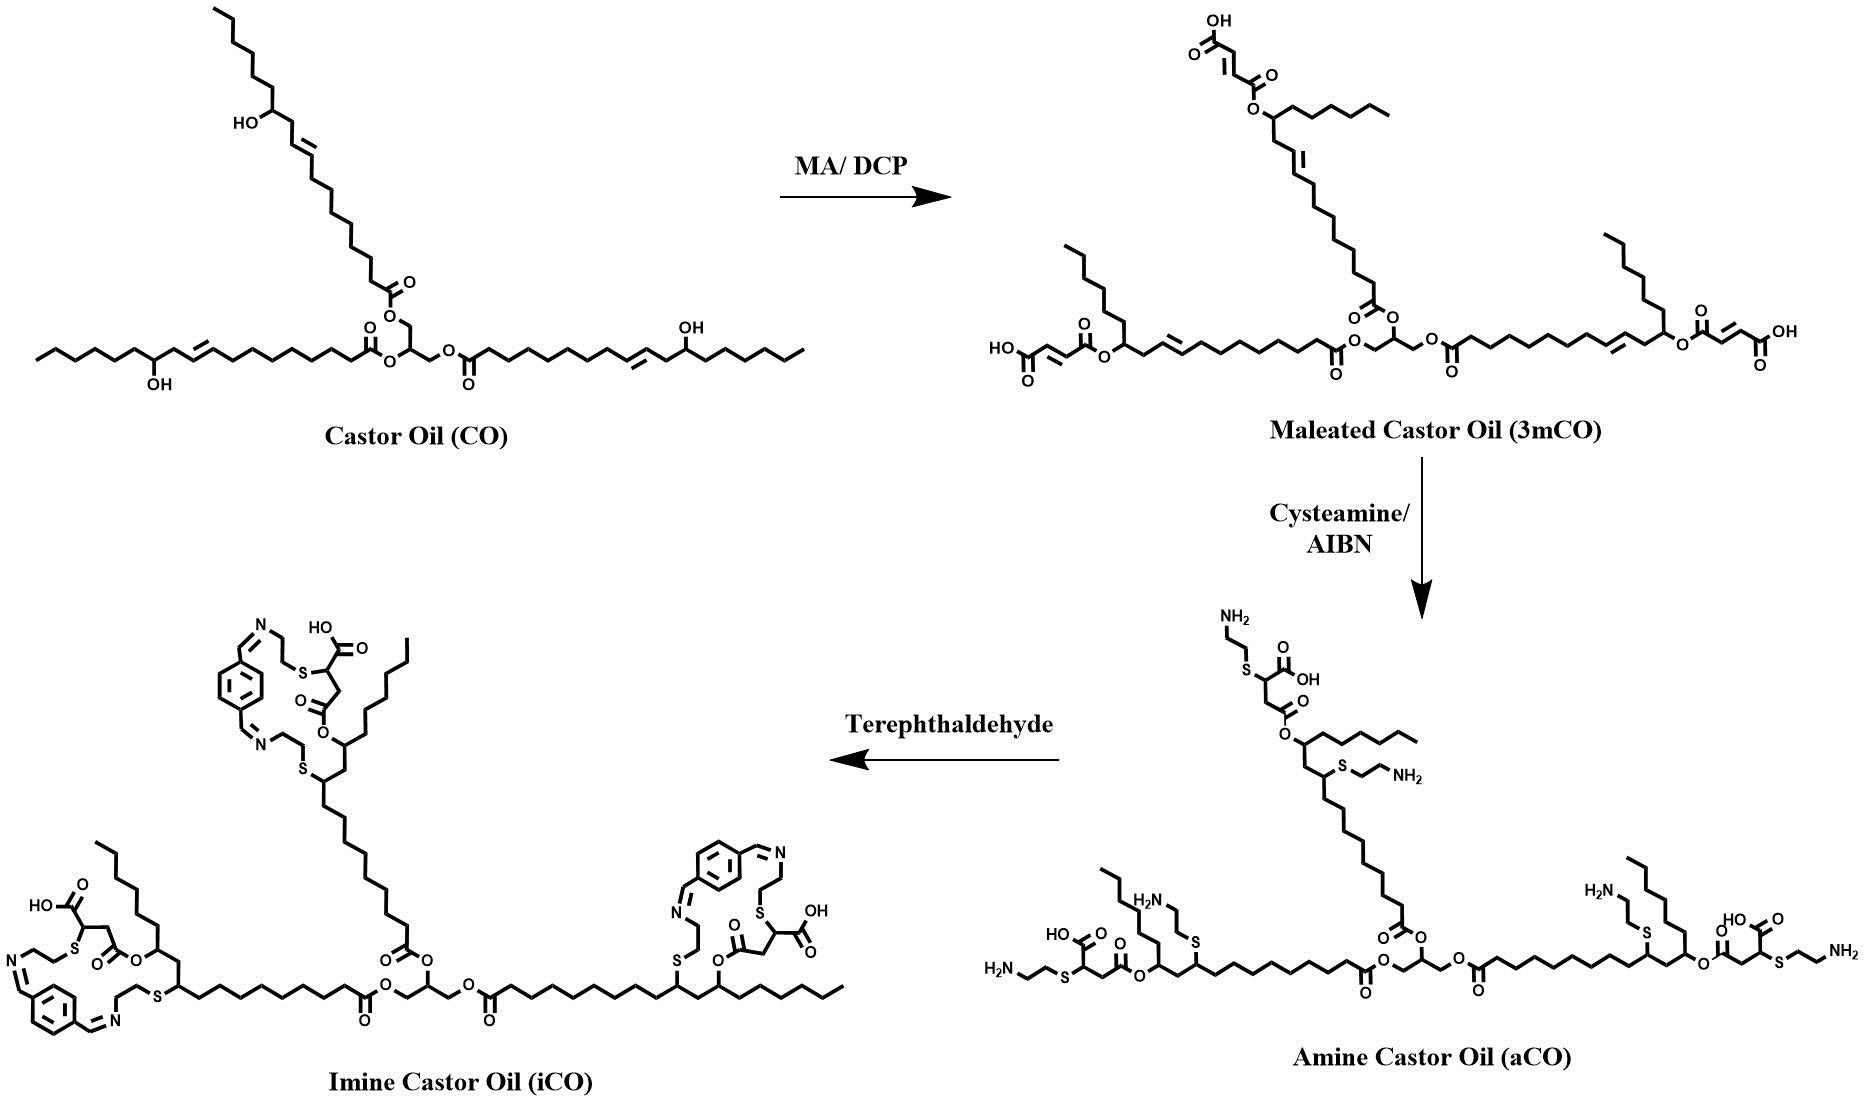


**Figure S1:** Reaction Schematic for the synthesis of imine castor oil (iCO)

**NMR Spectra Analysis for synthesized oil derivatives:**

The formation of the intermediate castor oil derivative for the formation of final product iCO was further confirmed through 1H NMR.

**(b)**

**(a)**

**Figure S2:** 1H NMR spectra for (a) 3mCO, (b) aCO and (c) iCO.

**(c)**

**1H NMR of 3mCO** (CDCl3, 500 MHz): 0.88 (9H, t, –CH3), 1.23–1.28 (54H, m, –CH2), 1.6–1.61 (6H, m, –CH2), 1.96–2.01 (9H, m, –CH2, –CH), 2.30–2.39 (12H, m, –CH2), 4.1–4.34 (4H, m, –CH2), 5.0–5.3 (2H, m, –CH), 5.4–5.5 (1H, m, –CH), 6.17–6.46 (2H, m, –CH).

**1H NMR of aCO** (D2O, 500 MHz): 0.88 (9H, t, –CH3), 1.01–1.3 (54H, m, –CH2), 1.36–1.46 (18H, m, –CH2), 1.71–1.73 (6H, m, –CH2), 2.07–2.15 (6H, broad, –NH2), 2.66–2.69 (9H, m, – CH2, –CH), 2.81–3.26 (18H, m, –CH2), 3.47–3.51 (4H, m, –CH2), 3.59–3.61 (15H, m, –CH2, –CH), 5.70–5.73 (1H, m, –CH).

**1H NMR of iCO** (D2O, 500 MHz): 0.88 (9H, t, –CH3), 1.2–1.4 (54H, m, –CH2), 1.5–1.7 (18H, m, –CH2), 1.7–2.5 (6H, m, –CH2), 2.7–2.9 (9H, m, –CH2, –CH), 2.9–3.4 (18H, m, –CH2), 3.5–3.7 (15H, m, –CH2, –CH), 3.7–3.9 (7H, m, –CH2, –CH), 5.96 (1H, m, –CH), 7.77–8.13 (18H, m, –CH), 9.94–10.07 (3H, m, –COOH).


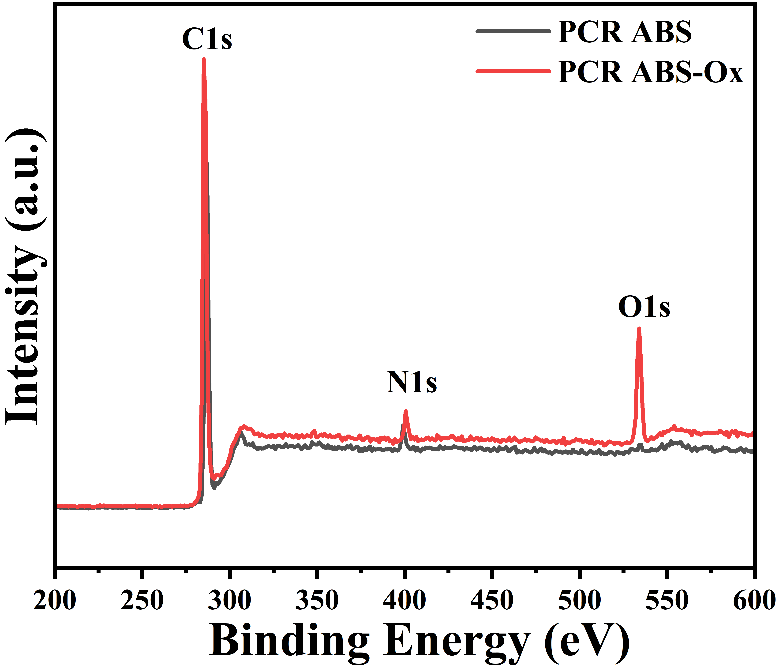

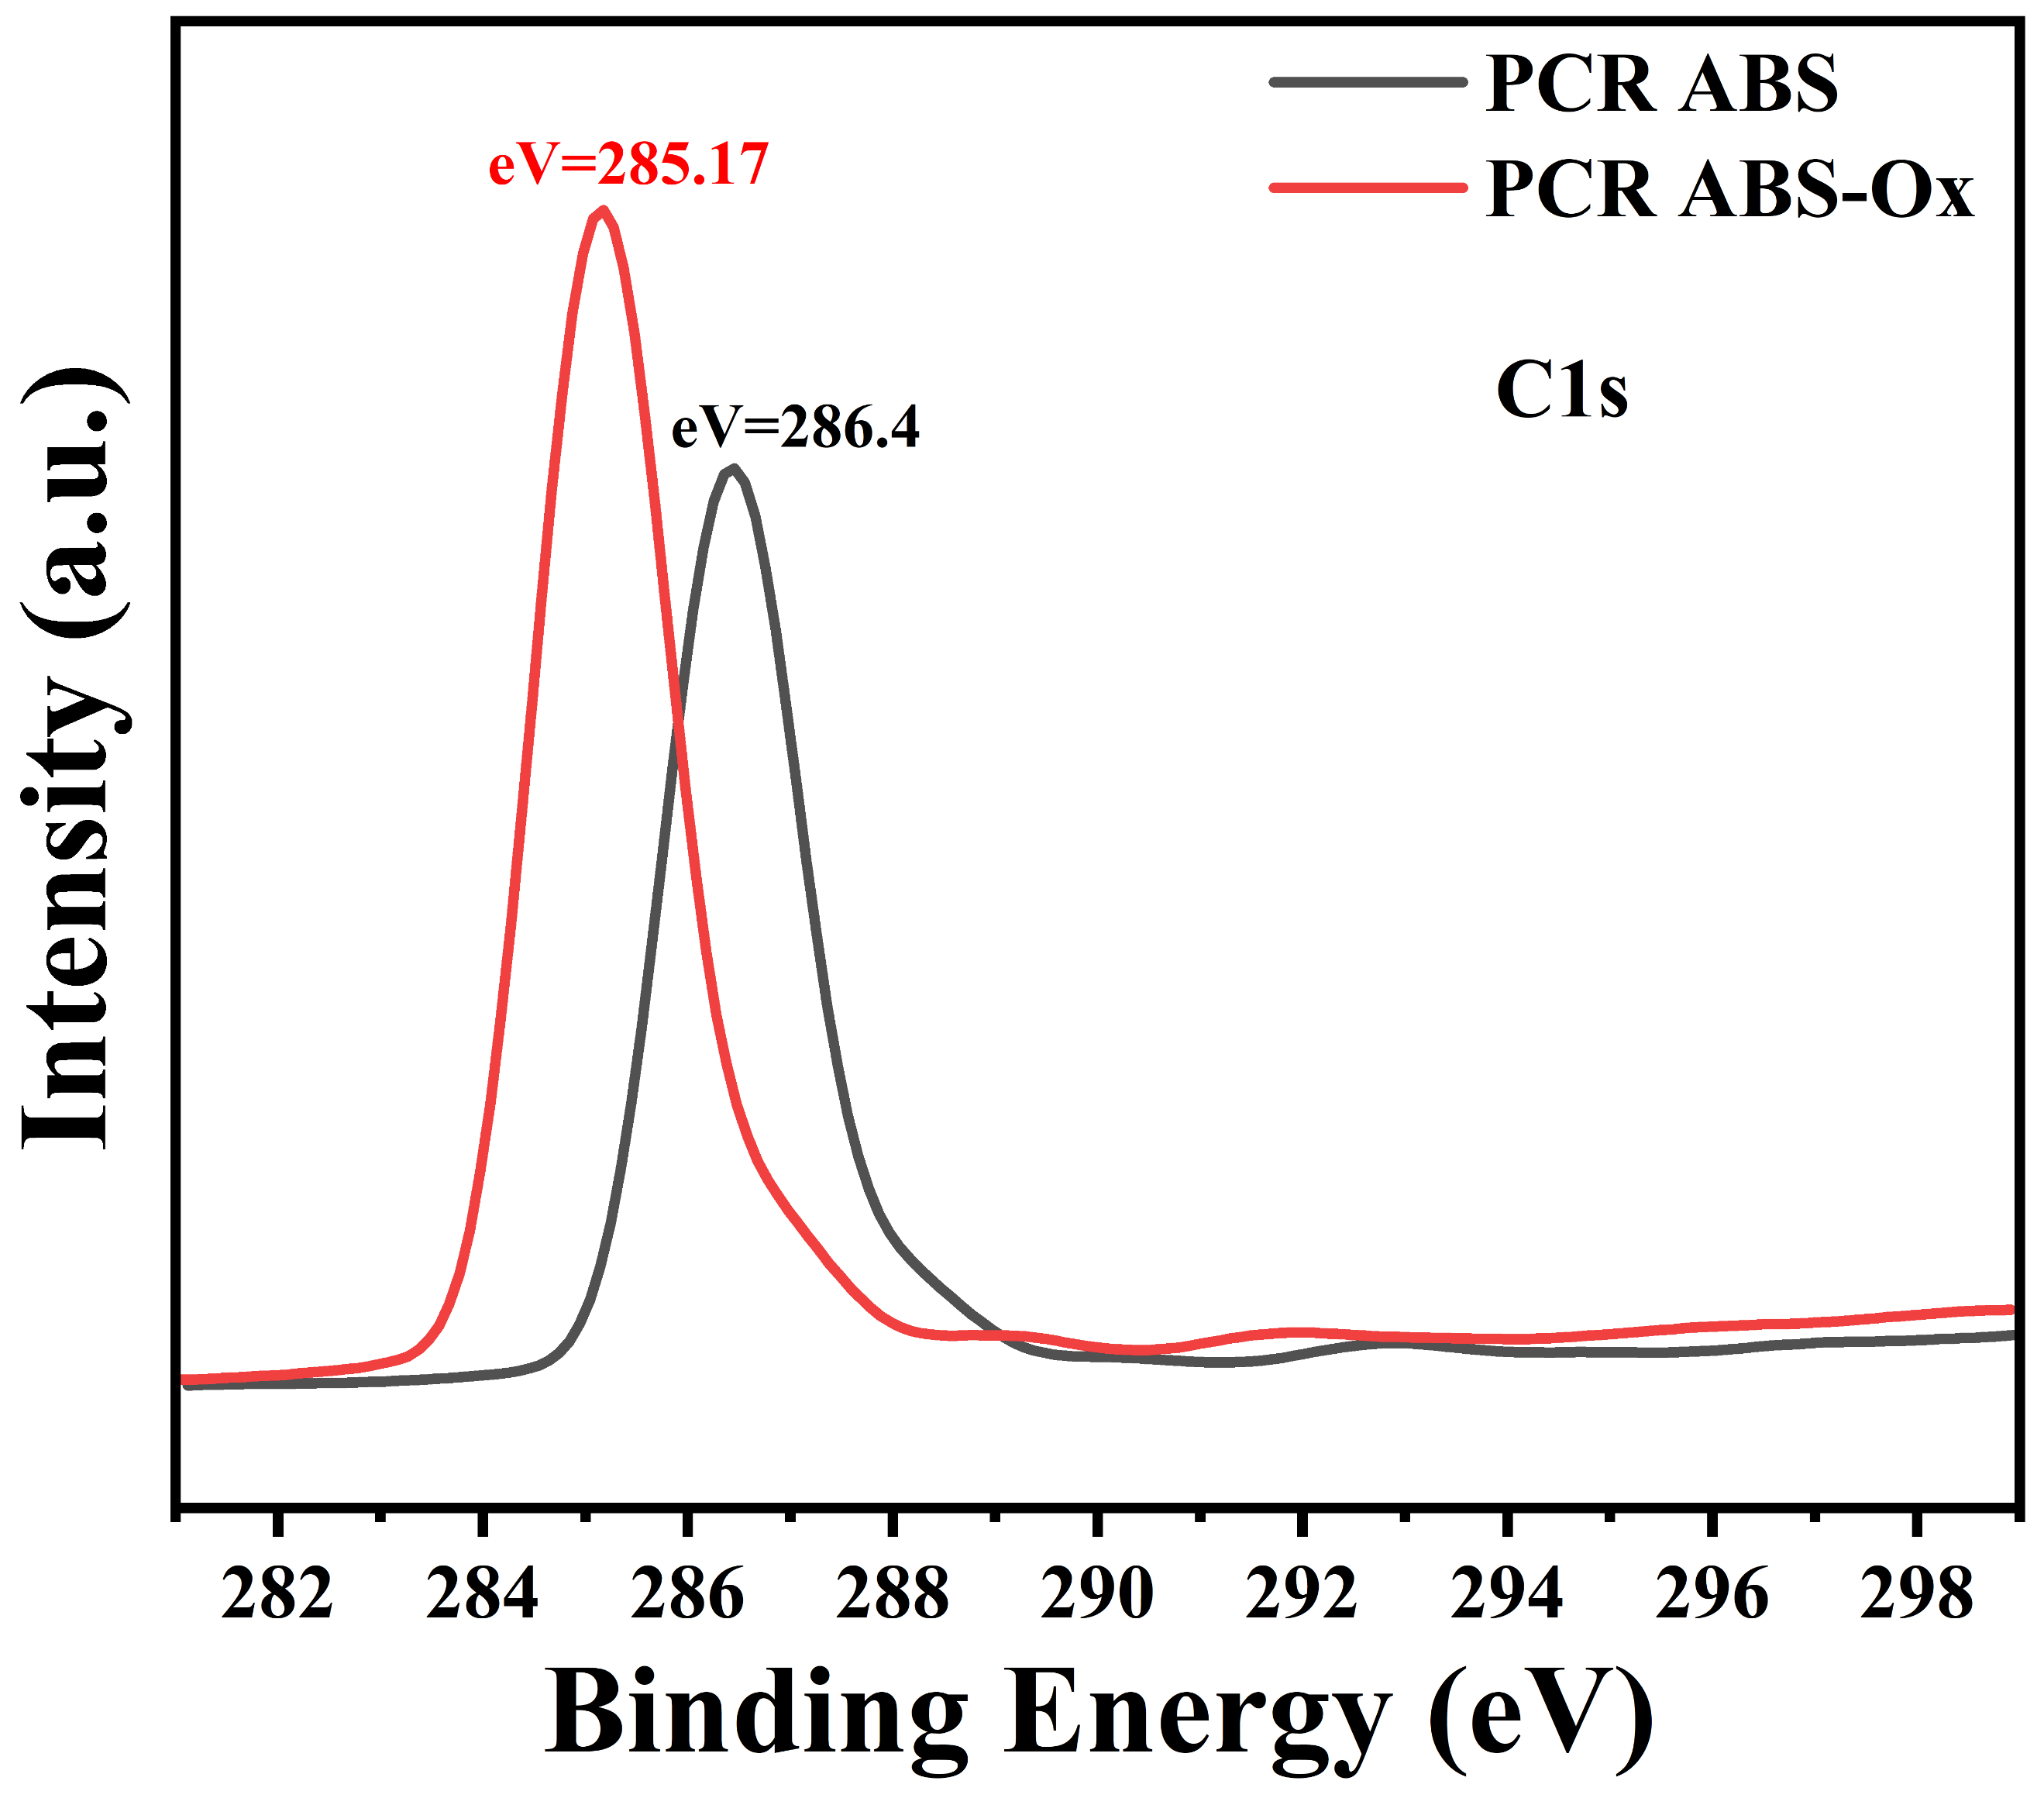

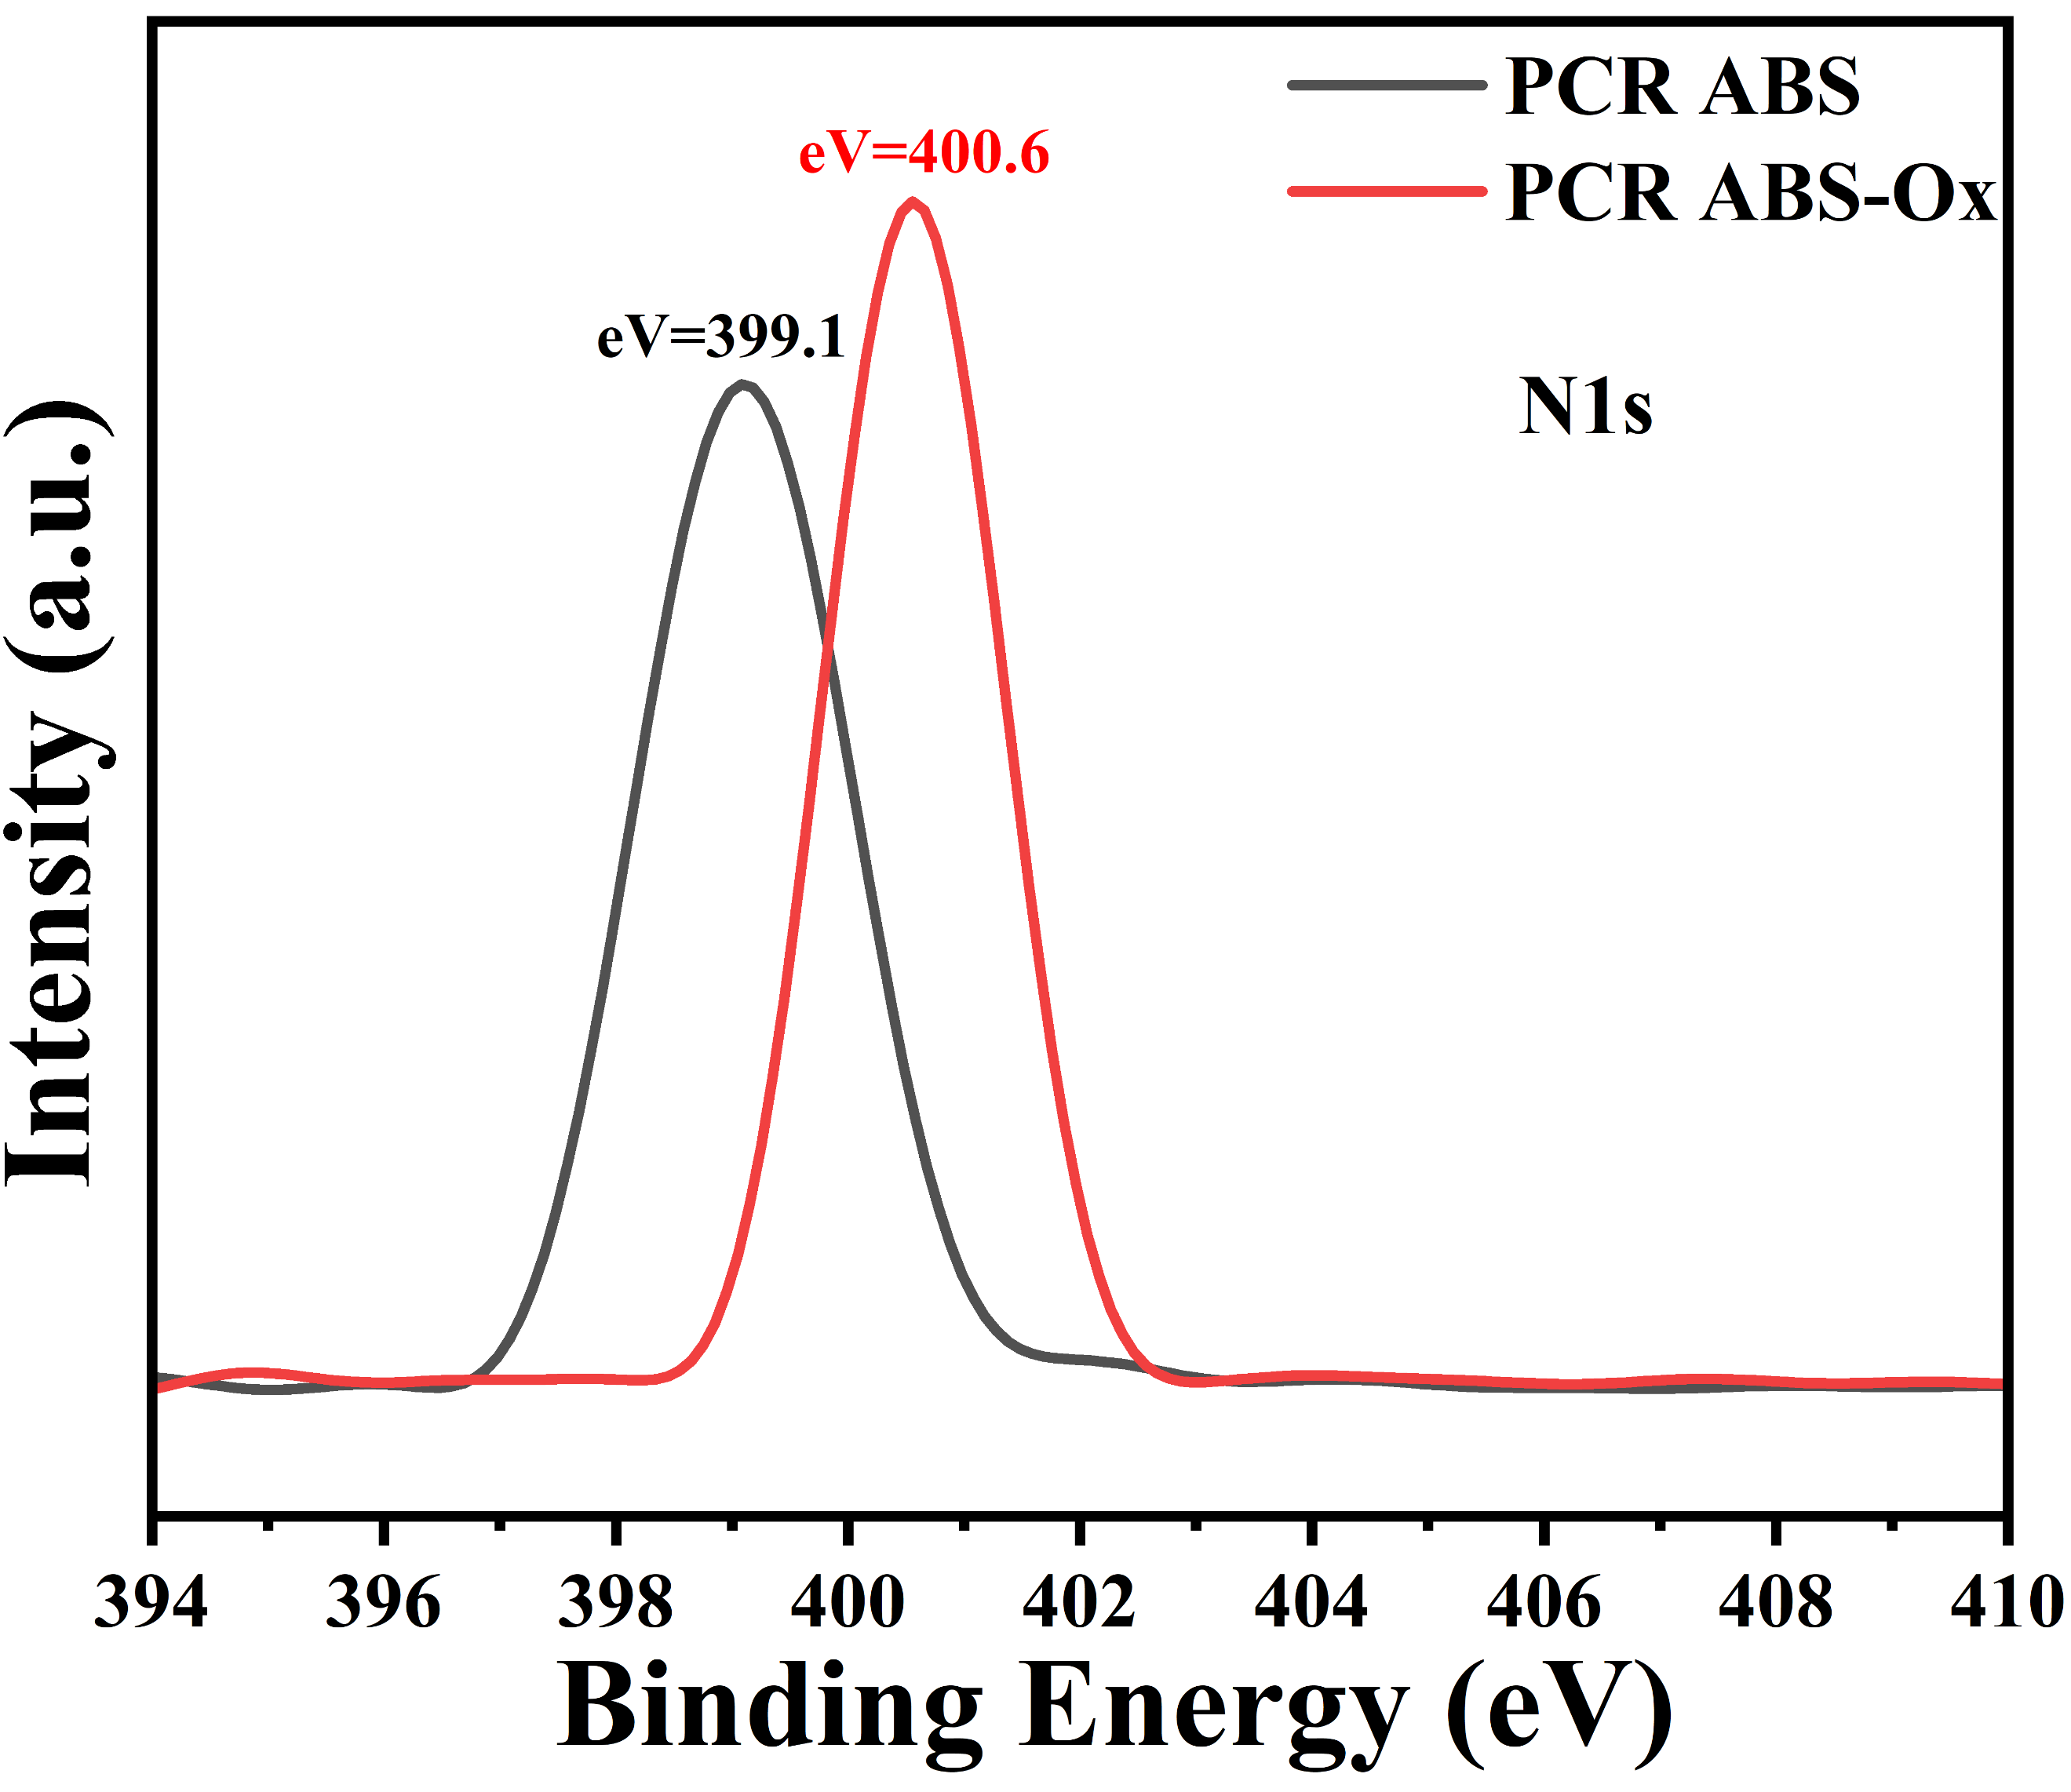


**(a)**

**(b)**

**(c)**

**Figure S3:** Comparative XPS study for PCR ABS and PCR ABS-Ox to confirm oxazoline formation. (a) whole range of XPS spectra; zoomed region for (b) C1s and (c) N1s.


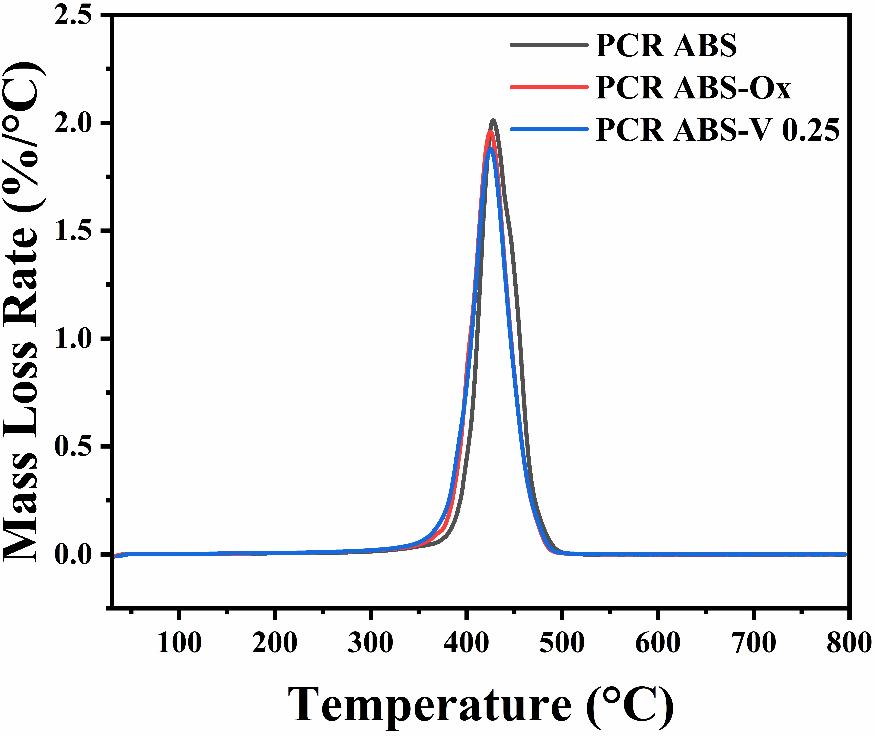


**Figure S4:** DTGA thermogram for PCR ABS, PCR ABS-Ox and PCR ABS-V 0.25.


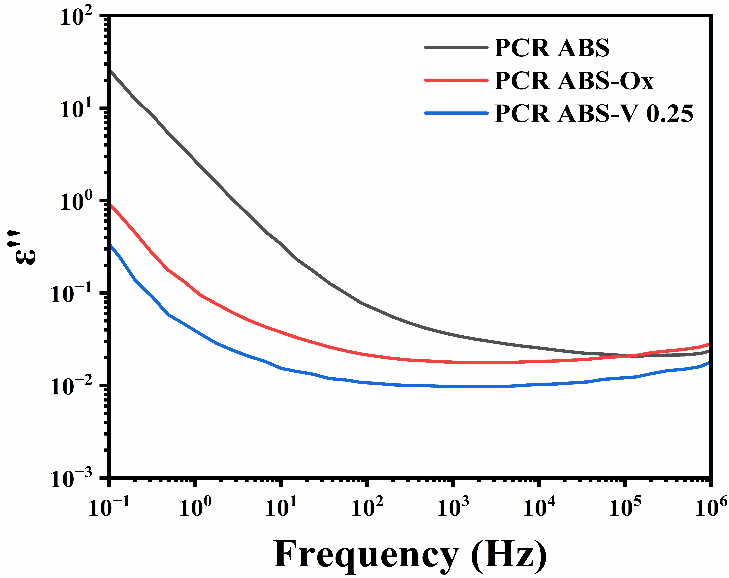


**Figure S5.** Dielectric loss spectra of PCR ABS, PCR ABS-Ox and PCR ABS-V 0.25.


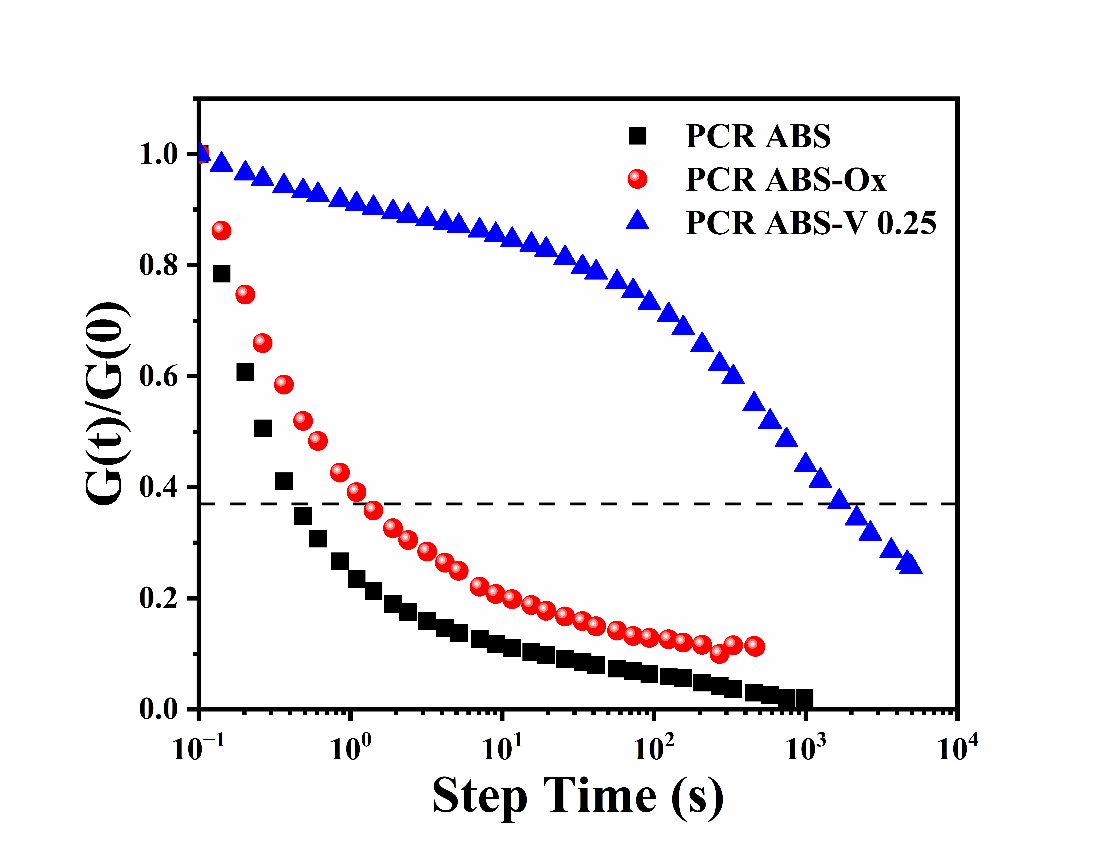


**Figure S6:** Stress Relaxation curves for PCR ABS, PCR ABS-Ox and PCR ABS-V 0.25 at 250 ℃.


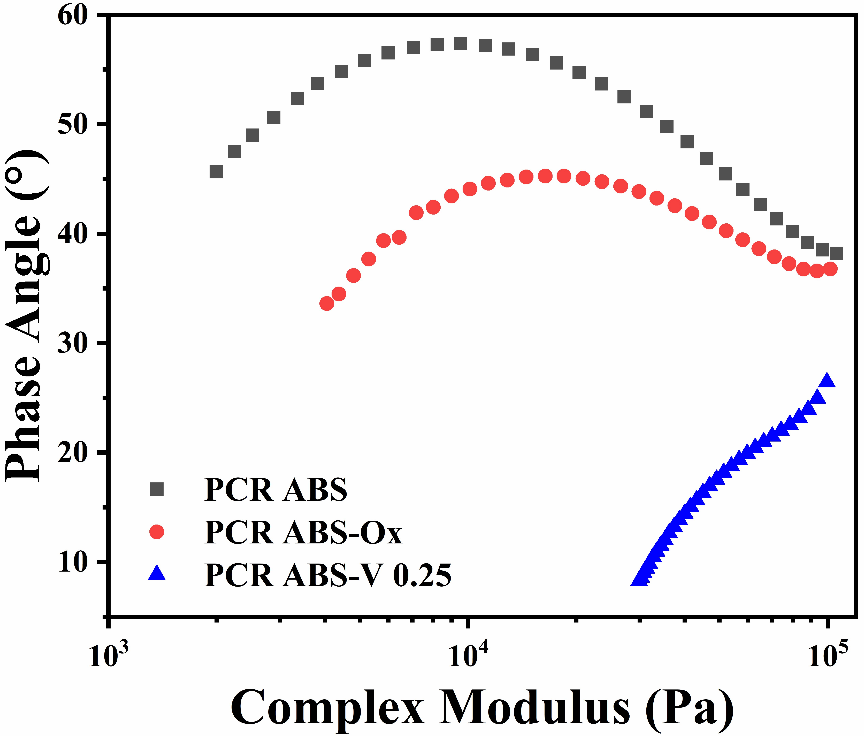


**Figure S7:** Van Gurp–Palmen plot for PCR ABS, PCR ABS-Ox and PCR ABS-V 0.25 at 220 ℃.


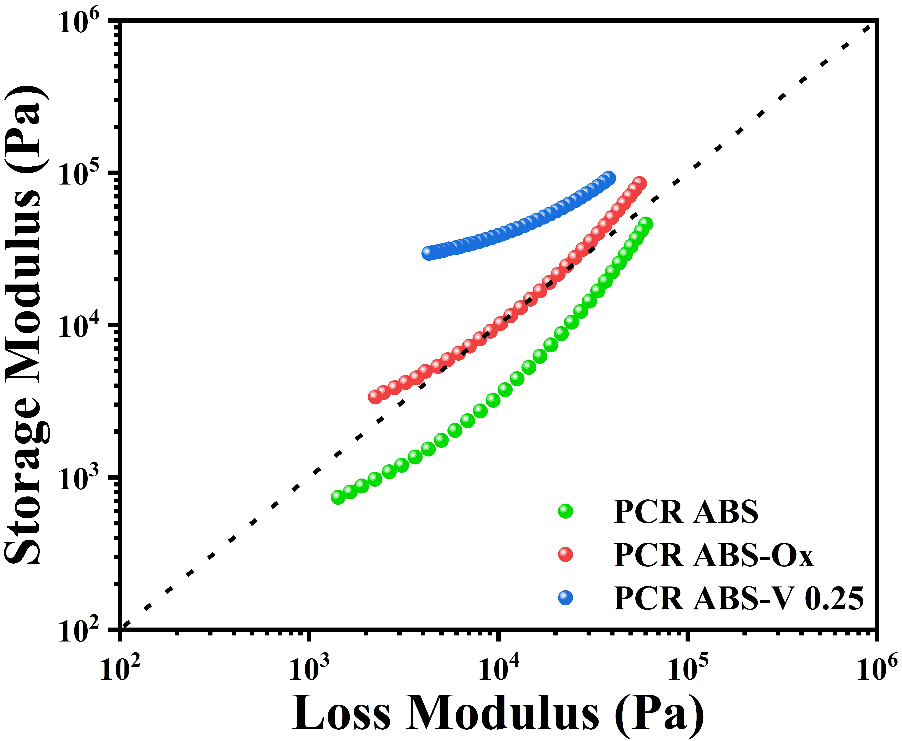


**Figure S8:** Modified Cole-Cole plots plot for PCR ABS, PCR ABS-Ox and PCR ABS-V 0.25 at 220 ℃.


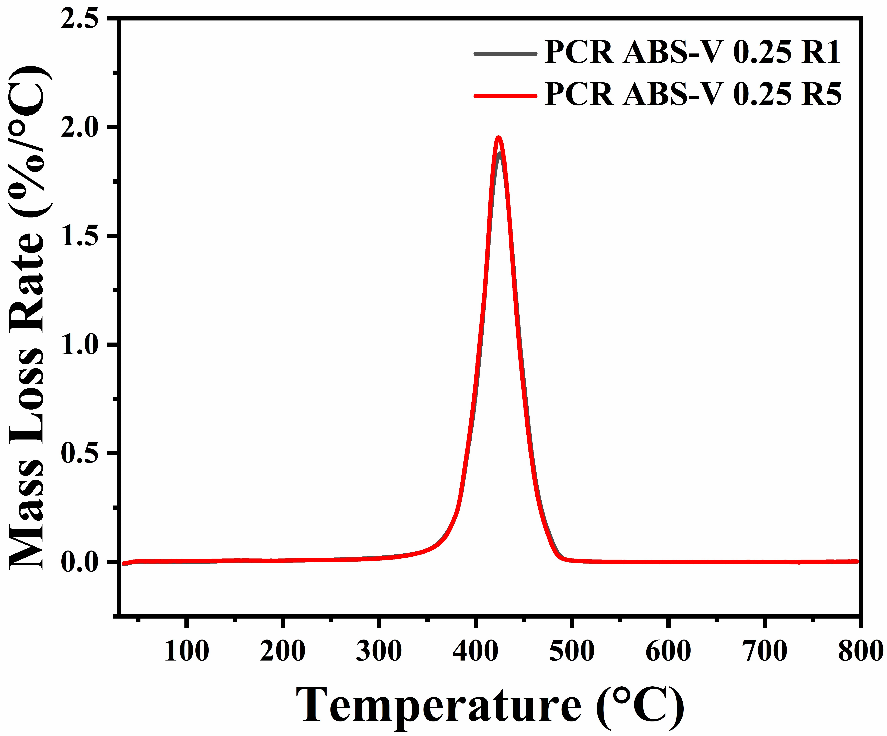


**Figure S9:** DTGA thermograms for R1 and R5 for PCR ABS V- 0.25.
